# Supplementary material for: Diversity of Rickettsiales in Rhipicephalus microplus Ticks Collected in Domestic Ruminants in Guizhou Province, China
Source: MDPI journal article supplement (doi:10.3390/pathogens11101108), 2022-09-27
Supplement: s1 [file s1]

Table S1. Genbank numbers of *Rickettsia*, *Anaplasma*, and *Ehrlichia* sequences obtained in this study.

|    | Gene | Genbank numbers | Bacterial strain                                             |
|----|------|-----------------|--------------------------------------------------------------|
| 1  | 16S  | OP047977        | Candidatus <i>Rickettsia</i> <i>jingxinensis</i> Qianxinan1  |
| 2  | 16S  | OP047978        | Candidatus <i>Rickettsia</i> <i>jingxinensis</i> Qianxinan3  |
| 3  | 16S  | OP047979        | Candidatus <i>Rickettsia</i> <i>jingxinensis</i> Qianxinan7  |
| 4  | 16S  | OP047980        | Candidatus <i>Rickettsia</i> <i>jingxinensis</i> Bijie2      |
| 5  | 16S  | OP047981        | Candidatus <i>Rickettsia</i> <i>jingxinensis</i> Bijie65     |
| 6  | 16S  | OP047982        | Candidatus <i>Rickettsia</i> <i>jingxinensis</i> Liupanshui4 |
| 7  | 16S  | OP047983        | Candidatus <i>Rickettsia</i> <i>jingxinensis</i> Liupanshui6 |
| 8  | 16S  | OP047984        | Candidatus <i>Rickettsia</i> <i>jingxinensis</i> Liupanshui8 |
| 9  | 16S  | OP047985        | <i>Ehrlichia</i> <i>canis</i> Qianxinan8                     |
| 10 | 16S  | OP047986        | <i>Ehrlichia</i> <i>canis</i> Qianxinan10                    |
| 11 | 16S  | OP047987        | <i>Ehrlichia</i> <i>minasensis</i> Qianxinan43               |
| 12 | 16S  | OP047988        | <i>Ehrlichia</i> <i>minasensis</i> Qianxinan50               |
| 13 | 16S  | OP047989        | <i>Ehrlichia</i> sp. Bijie2                                  |
| 14 | 16S  | OP047990        | <i>Ehrlichia</i> sp. Bijie3                                  |
| 15 | 16S  | OP047991        | <i>Ehrlichia</i> <i>minasensis</i> Liuzhi20                  |
| 16 | 16S  | OP047992        | <i>Ehrlichia</i> <i>minasensis</i> Liuzhi32                  |
| 17 | 16S  | OP047993        | <i>Ehrlichia</i> sp. Liuzhi61                                |
| 18 | 16S  | OP047994        | <i>Ehrlichia</i> sp. Liuzhi89                                |
| 19 | 16S  | OP047995        | <i>Ehrlichia</i> sp. Liuzhi92                                |
| 20 | 16S  | OP047996        | <i>Anaplasma</i> <i>capra</i> Qianxinan42                    |
| 21 | 16S  | OP047997        | <i>Anaplasma</i> <i>capra</i> Qianxinan47                    |
| 22 | 16S  | OP047998        | <i>Anaplasma</i> <i>ovis</i> Qianxinan22                     |
| 23 | 16S  | OP047999        | <i>Anaplasma</i> <i>marginale</i> Bijie15                    |
| 24 | 16S  | OP048000        | <i>Anaplasma</i> <i>marginale</i> Liuzhi24                   |
| 25 | 16S  | OP048001        | Candidatus <i>Anaplasma</i> <i>boleense</i> Bijie42          |
| 26 | 16S  | OP048002        | Candidatus <i>Anaplasma</i> <i>boleense</i> Bijie50          |
| 27 | 16S  | OP048003        | Candidatus <i>Anaplasma</i> <i>boleense</i> Bijie52          |
| 28 | gltA | OP080652        | Candidatus <i>Rickettsia</i> <i>jingxinensis</i> Qianxinan1  |
| 29 | gltA | OP080653        | Candidatus <i>Rickettsia</i> <i>jingxinensis</i> Qianxinan3  |
| 30 | gltA | OP080654        | Candidatus <i>Rickettsia</i> <i>jingxinensis</i> Qianxinan7  |
| 31 | gltA | OP080655        | Candidatus <i>Rickettsia</i> <i>jingxinensis</i> Bijie2      |
| 32 | gltA | OP080656        | Candidatus <i>Rickettsia</i> <i>jingxinensis</i> Bijie65     |
| 33 | gltA | OP080657        | Candidatus <i>Rickettsia</i> <i>jingxinensis</i> Liupanshui4 |
| 34 | gltA | OP080658        | Candidatus <i>Rickettsia</i> <i>jingxinensis</i> Liupanshui6 |
| 35 | gltA | OP080659        | Candidatus <i>Rickettsia</i> <i>jingxinensis</i> Liupanshui8 |
| 36 | gltA | OP080668        | <i>Ehrlichia</i> <i>canis</i> Qianxinan8                     |
| 37 | gltA | OP080669        | <i>Ehrlichia</i> <i>canis</i> Qianxinan10                    |
| 38 | gltA | OP080670        | <i>Ehrlichia</i> <i>minasensis</i> Qianxinan43               |

|    |       |          |                                                |
|----|-------|----------|------------------------------------------------|
| 39 | gltA  | OP080671 | Ehrlichia_minasensis_Qianxinan50               |
| 40 | gltA  | OP080672 | Ehrlichia_sp._Bijie2                           |
| 41 | gltA  | OP080673 | Ehrlichia_sp._Bijie3                           |
| 42 | gltA  | OP080674 | Ehrlichia_minasensis_Liuzhi20                  |
| 43 | gltA  | OP080675 | Ehrlichia_minasensis_Liuzhi32                  |
| 44 | gltA  | OP080676 | Ehrlichia_sp._Liuzhi61                         |
| 45 | gltA  | OP080677 | Ehrlichia_sp._Liuzhi89                         |
| 46 | gltA  | OP080678 | Ehrlichia_sp._Liuzhi92                         |
| 47 | gltA  | OP080690 | Anaplasma_capra_Qianxinan42                    |
| 48 | gltA  | OP080691 | Anaplasma_capra_Qianxinan47                    |
| 49 | gltA  | OP080692 | Anaplasma_ovis_Qianxinan22                     |
| 50 | gltA  | OP080693 | Anaplasma_marginale_Bijie15                    |
| 51 | gltA  | OP080694 | Candidatus_Anaplasma_boleense_Bijie42          |
| 52 | gltA  | OP080695 | Candidatus_Anaplasma_boleense_Bijie50          |
| 53 | gltA  | OP080696 | Candidatus_Anaplasma_boleense_Bijie52          |
| 54 | groEL | OP080660 | Candidatus_Rickettsia_jingxinensis_Qianxinan1  |
| 55 | groEL | OP080661 | Candidatus_Rickettsia_jingxinensis_Qianxinan3  |
| 56 | groEL | OP080662 | Candidatus_Rickettsia_jingxinensis_Qianxinan7  |
| 57 | groEL | OP080663 | Candidatus_Rickettsia_jingxinensis_Bijie2      |
| 58 | groEL | OP080664 | Candidatus_Rickettsia_jingxinensis_Bijie65     |
| 59 | groEL | OP080665 | Candidatus_Rickettsia_jingxinensis_Liupanshui4 |
| 60 | groEL | OP080666 | Candidatus_Rickettsia_jingxinensis_Liupanshui6 |
| 61 | groEL | OP080667 | Candidatus_Rickettsia_jingxinensis_Liupanshui8 |
| 62 | groEL | OP080679 | Ehrlichia_canis_Qianxinan8                     |
| 63 | groEL | OP080680 | Ehrlichia_canis_Qianxinan10                    |
| 64 | groEL | OP080681 | Ehrlichia_minasensis_Qianxinan43               |
| 65 | groEL | OP080682 | Ehrlichia_minasensis_Qianxinan50               |
| 66 | groEL | OP080683 | Ehrlichia_sp._Bijie2                           |
| 67 | groEL | OP080684 | Ehrlichia_sp._Bijie3                           |
| 68 | groEL | OP080685 | Ehrlichia_minasensis_Liuzhi20                  |
| 69 | groEL | OP080686 | Ehrlichia_minasensis_Liuzhi32                  |
| 70 | groEL | OP080687 | Ehrlichia_sp._Liuzhi61                         |
| 71 | groEL | OP080688 | Ehrlichia_sp._Liuzhi89                         |
| 72 | groEL | OP080689 | Ehrlichia_sp._Liuzhi92                         |
| 73 | groEL | OP080697 | Anaplasma_capra_Qianxinan42                    |
| 74 | groEL | OP080698 | Anaplasma_capra_Qianxinan47                    |
| 75 | groEL | OP080699 | Anaplasma_ovis_Qianxinan22                     |
| 76 | groEL | OP080703 | Anaplasma_marginale_Bijie15                    |
| 77 | groEL | OP080704 | Anaplasma_marginale_Liuzhi24                   |
| 78 | groEL | OP080700 | Candidatus_Anaplasma_boleense_Bijie42          |
| 79 | groEL | OP080701 | Candidatus_Anaplasma_boleense_Bijie50          |
| 80 | groEL | OP080702 | Candidatus_Anaplasma_boleense_Bijie52          |
