# Supplementary material for: Diversity of Rickettsiales in Rhipicephalus microplus Ticks Collected in Domestic Ruminants in Guizhou Province, China
Source: MDPI journal article supplement (doi:10.3390/pathogens11101108), 2022-09-27
Supplement: s1 [file s1]

Table S2 The primers used for amplification of 16S, *gltA*, *groEL*, and *ompA* genes from *Rickettsia*, *Anaplasma*, and *Ehrlichia* by nested PCR or hemi-nested PCR.

| Primer     | Cycle | Bacteria                            | Gene        | Sequence                   | Anticipated<br>amplicon length | Reference           |
|------------|-------|-------------------------------------|-------------|----------------------------|--------------------------------|---------------------|
| Eh1        | 1     | Anaplasmataceae                     | 16S         | 5-AACGAACGCTGGCGGCAAGC-3   | 450 bp                         | Guo et al.,<br>2019 |
| Eh2        | 1     | Anaplasmataceae                     | 16S         | 5-AGTAYCGRACCAGATAGCCGC-3  |                                |                     |
| Eh3        | 2     | Anaplasmataceae                     | 16S         | 5-TGCATAGGAATCTACCTAGTAG-3 |                                |                     |
| Eh4        | 2     | Anaplasmataceae                     | 16S         | 5-CTAGGAATTCCGCTATCCTCT-3  |                                |                     |
| Ric-F      | 1, 2  | <i>Rickettsia</i>                   | 16S         | 5-YTACGGAATAACTTTTAGAAA-3  | 900 bp                         | Lu et al.,<br>2022  |
| Ric-R1     | 1     | <i>Rickettsia</i>                   | 16S         | 5-CATGATGACTTGACRTC GT-3   |                                |                     |
| Ric-R2     | 2     | <i>Rickettsia</i>                   | 16S         | 5-CATCTCACGACACGAGCTG-3    |                                |                     |
| fD1        | 1, 2  | <i>Rickettsia</i> , Anaplasmataceae | 16S         | 5-AGAGTTTGATCCTGGCTCAG-3   | 1100-1300 bp                   | Guo et al.,<br>2019 |
| rp2        | 1     | <i>Rickettsia</i> , Anaplasmataceae | 16S         | 5-ACGGCTACCTTGTTACGACTT-3  |                                |                     |
| Eh2        | 2     | <i>Rickettsia</i> , Anaplasmataceae | 16S         | 5-AGTAYCGRACCAGATAGCCGC-3  |                                |                     |
| Ric-glt-F1 | 1     | <i>Rickettsia</i>                   | <i>gltA</i> | 5-CCGGGYTTTATGTCTACTGC-3   | 1100 bp                        | Guo et al.,<br>2019 |
| Ric-glt-F2 | 2     | <i>Rickettsia</i>                   | <i>gltA</i> | 5-CTTTATGTCTACTGCKTCTTG-3  |                                |                     |

|              |      |                            |              |                             |         |                     |
|--------------|------|----------------------------|--------------|-----------------------------|---------|---------------------|
| Ric-glt-R    | 1, 2 | <i>Rickettsia</i>          | <i>gltA</i>  | 5-AGCTGTCTWGGTCTGCTGATT-3   | 1100 bp | Guo et al.,<br>2019 |
| Ric-gro-F1   | 1    | <i>Rickettsia</i>          | <i>groEL</i> | 5-CCATTACATGATAGAATTGCAAT-3 |         |                     |
| Ric-gro-F2   | 2    | <i>Rickettsia</i>          | <i>groEL</i> | 5-GAATTGCAATAAAGCCTATCG-3   |         |                     |
| Ric-gro-R    | 1, 2 | <i>Rickettsia</i>          | <i>groEL</i> | 5-CCATCATTGCTTTTCTTCTATC-3  |         |                     |
| Bole-gltA-F1 | 1    | <i>Ca. A. boleense</i>     | <i>gltA</i>  | 5-GYAGCATAGCGYATTTGTTGTTG-3 | 700 bp  | This study          |
| Bole-gltA-F2 | 2    | <i>Ca. A. boleense</i>     | <i>gltA</i>  | 5-TTGAGAGATGAGTATGTYCTACC-3 |         |                     |
| Bole-gltA-R  | 1, 2 | <i>Ca. A. boleense</i>     | <i>gltA</i>  | 5-TCAACRTTAGGGTAAAGCTTGCG-3 |         |                     |
| Capra-glt-F1 | 1    | <i>Anaplasma capra</i>     | <i>gltA</i>  | 5-ATGATCCGGGGTTCCTGTC-3     | 800 bp  | Guo et al.,<br>2019 |
| Capra-glt-F2 | 2    | <i>Anaplasma capra</i>     | <i>gltA</i>  | 5-TGCAGGTCTGAGATAACCT-3     |         |                     |
| Capra-glt-R  | 1, 2 | <i>Anaplasma capra</i>     | <i>gltA</i>  | 5-TACAATACCGGAGTAAAAGT-3    |         |                     |
| Ovis-F       | 1, 2 | <i>Anaplasma ovis</i>      | <i>gltA</i>  | 5-GTGAGCTTGCCGACTTTGT-3     | 560 bp  | Guo et al.,<br>2019 |
| Ovis-R1      | 1    | <i>Anaplasma ovis</i>      | <i>gltA</i>  | 5-GTTCTTGTAGACYCTGTGG-3     |         |                     |
| Ovis-R2      | 2    | <i>Anaplasma ovis</i>      | <i>gltA</i>  | 5-ATGAGTCTCACTCCGCTCT-3     |         |                     |
| Ana-glt-F1   | 1    | <i>Anaplasma marginale</i> | <i>gltA</i>  | 5-CATCCNATGGCTATTYTCAT-3    | 900 bp  | Lu et al.,<br>2022  |
| Ana-glt-R1   | 1    | <i>Anaplasma marginale</i> | <i>gltA</i>  | 5-ACTATACCKGAGTAAAAGTC-3    |         |                     |
| Ana-glt-F2   | 2    | <i>Anaplasma marginale</i> | <i>gltA</i>  | 5-GAYCACGARCARAATGCTTC-3    |         |                     |
| Ana-glt-R2   | 2    | <i>Anaplasma marginale</i> | <i>gltA</i>  | 5-GAGTAAAAGTCGACRTTKGG-3    |         |                     |

|             |      |                        |              |                              |         |                     |
|-------------|------|------------------------|--------------|------------------------------|---------|---------------------|
| Ana-gro-F1  | 1    | <i>Anaplasma</i> sp.   | <i>groEL</i> | 5-GYCAGTGGGCTGGTAATGAA-3     | 1100 bp | Lu et al.,<br>2022  |
| Ana-gro-R1  | 1    | <i>Anaplasma</i> sp.   | <i>groEL</i> | 5-CCWCCTGGTACWACACCTTC-3     |         |                     |
| Ana-gro-F2  | 2    | <i>Anaplasma</i> sp.   | <i>groEL</i> | 5-ATAGTYATGAAGGAGAGTGAT-3    |         |                     |
| Ana-gro-R2  | 2    | <i>Anaplasma</i> sp.   | <i>groEL</i> | 5-TCAACAGCAGCTCTAGTWG-3      |         |                     |
| Bole-F1     | 1    | <i>Ca. A. boleense</i> | <i>groEL</i> | 5-CCGGAAATCACAAAAGACG-3      | 800 bp  | This study          |
| Bole-F2     | 2    | <i>Ca. A. boleense</i> | <i>groEL</i> | 5-GCTATAAAGTGATGAAGAGTATT-3  |         |                     |
| Bole-R      | 1, 2 | <i>Ca. A. boleense</i> | <i>groEL</i> | 5-AATACTTTCGGAATTACTATCTAC-3 |         |                     |
| Ehr-gltA-F1 | 1    | <i>Ehrlichia</i>       | <i>gltA</i>  | 5-TATGRTCRAAGAAGCAGTATT-3    | 1000 bp | Lu et al.,<br>2022  |
| Ehr-gltA-F2 | 2    | <i>Ehrlichia</i>       | <i>gltA</i>  | 5-GGAATATTAACCTTATGATCC-3    |         |                     |
| Ehr-gltA-R  | 1, 2 | <i>Ehrlichia</i>       | <i>gltA</i>  | 5-CTGACGTGGACGACATATCT-3     |         |                     |
| Ehr-gro-F1  | 1    | <i>Ehrlichia</i>       | <i>groEL</i> | 5-TGGGCTGGYAATGAAATTGA-3     | 1100 bp | Lu et al.,<br>2022  |
| Ehr-gro-F2  | 2    | <i>Ehrlichia</i>       | <i>groEL</i> | 5-AACATGGCAAATGTAGTTGT-3     |         |                     |
| Ehr-gro-R   | 1, 2 | <i>Ehrlichia</i>       | <i>groEL</i> | 5-TCAACAGCAGCTCTAGTTG-3      |         |                     |
| Rr190.70    | 1, 2 | <i>Rickettsia</i>      | <i>ompA</i>  | 5-ATGGCGAATATTTCTCCAAA-3     | 700 bp  | Guo et al.,<br>2019 |
| Ric-R1      | 1    | <i>Rickettsia</i>      | <i>ompA</i>  | 5-ACCTACATTATCAAHGCCTGT-3    |         |                     |
| Ric-R2      | 2    | <i>Rickettsia</i>      | <i>ompA</i>  | 5-ACCTSTTAATACTGCATTTRCAT-3  |         |                     |
