# Supplementary material for: Diversity of Rickettsiales in Rhipicephalus microplus Ticks Collected in Domestic Ruminants in Guizhou Province, China
Source: MDPI journal article supplement (doi:10.3390/pathogens11101108), 2022-09-27
Supplement: s1 [file s1]

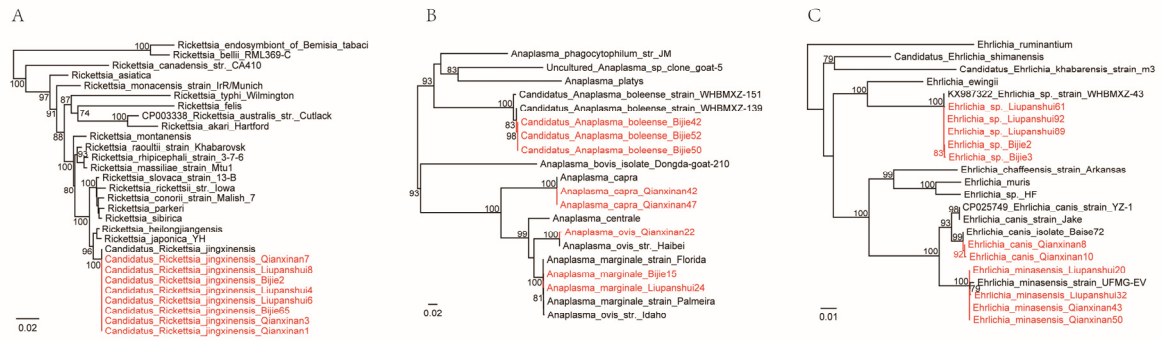

Figure S1. Phylogenetic trees constructed by PhyML 3.0 software (GTR model) based on concatenated sequences of the *Rickettsia*, *Ehrlichia*, and *Anaplasma* strains

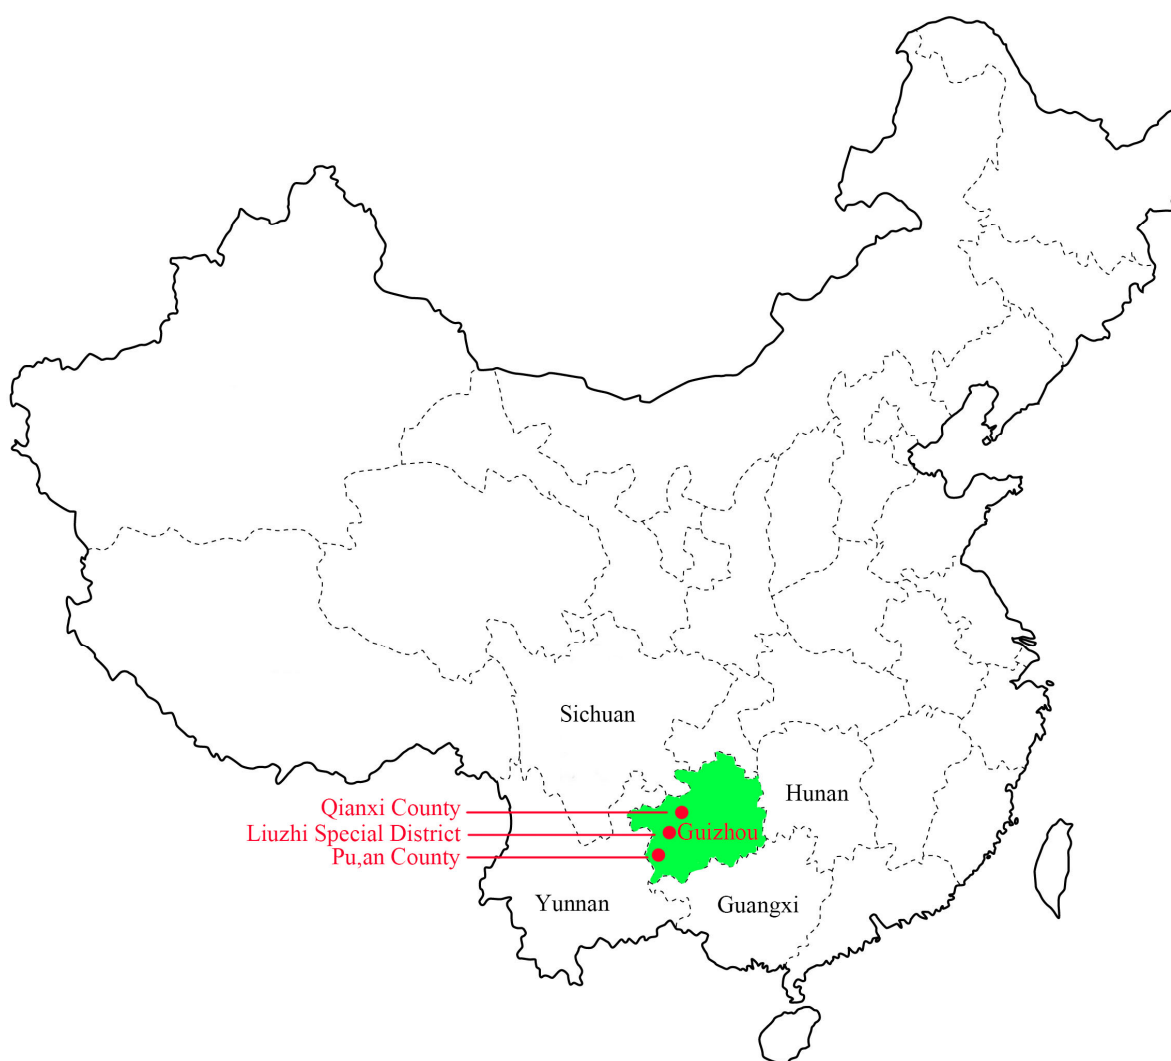

Figure S2. Map showing the locations where the samples were collected: Puan County of Qianxinan Bouyei-and-Miao Autonomous Prefecture; Liuzhi Special District of Liupanshui City; and Qianxi County of Bijie City
